# Supplementary material
Source: PubMed Central journal article supplement (PMC2254550)
Supplement: blood_blood-2007-10-116186_1.pdf [file blood_blood-2007-10-116186_1.pdf]

A.

|                                                       | Pts | CRs | OR    | 95% CI        | P     |
|-------------------------------------------------------|-----|-----|-------|---------------|-------|
| Univariate analyses based on all patients             |     |     |       |               |       |
| Age (yrs)                                             | 200 | 159 | 0.959 | 0.936 – 0.983 | .0007 |
| PS 2-3? (0=No, 1=Yes)                                 | 200 | 159 | 0.89  | 0.28 – 2.87   | .85   |
| Male? (0=No, 1=Yes)                                   | 200 | 159 | 0.98  | 0.48 – 1.97   | .94   |
| Nonwhite? (0=No, 1=Yes)                               | 198 | 157 | 1.67  | 0.55 – 5.11   | .35   |
| WBC (1000/mm <sup>3</sup> )                           | 200 | 159 | 0.995 | 0.989 – 1.002 | .17   |
| Peripheral blasts (%)                                 | 186 | 147 | 0.987 | 0.975 – 0.999 | .033  |
| Peripheral blasts (1000/mm <sup>3</sup> )             | 186 | 147 | 0.989 | 0.979 – 0.999 | .025  |
| Periph. lymphocytes (%)                               | 195 | 155 | 1.013 | 0.998 – 1.028 | .081  |
| Periph. lymphs (1000/mm <sup>3</sup> )                | 195 | 155 | 0.997 | 0.978 – 1.021 | .74   |
| Periph. neutrophils (%)                               | 196 | 156 | 1.021 | 0.996 – 1.052 | .11   |
| Periph. neuts (1000/mm <sup>3</sup> )                 | 196 | 156 | 1.009 | 0.955 – 1.066 | .73   |
| Hemoglobin (g/dL)                                     | 197 | 158 | 1.095 | 0.923 – 1.299 | .29   |
| Platelets (1000/mm <sup>3</sup> )                     | 200 | 159 | 1.000 | 0.995 – 1.004 | .89   |
| Marrow blasts (%)                                     | 162 | 131 | 1.006 | 0.986 – 1.026 | .56   |
| Cytogenetically evaluable?<br>(0=No,1=Yes)            | 200 | 159 | 0.82  | 0.37 – 1.74   | .62   |
| Analyses based on cytogenetically evaluable patients  |     |     |       |               |       |
| t(9;22)/ <i>BCR/ABL1</i> ?<br>(0=No,1=Yes)            | 140 | 110 | 0.42  | 0.18 – 1.00   | .051  |
| Heterogeneity among 4 karyotype categories (P = 0.21) |     |     |       |               |       |
| Normal diploid                                        | 31  | 27  | 1.00  | Referent      | Ref.  |
| t(9;22)/ <i>BCR/ABL1</i>                              | 36  | 24  | 0.30  | 0.08 – 0.98   | .058  |
| Other unfavorable <sup>1</sup>                        | 19  | 15  | 0.56  | 0.12 – 2.65   | .45   |
| Miscellaneous                                         | 54  | 44  | 0.65  | 0.17 – 2.16   | .50   |

<sup>1</sup> Other unfavorable is defined by the presence of -7, +8, and 11q23/*MLL* gene rearrangements.

Abbreviations: Pts = number of patients included in analysis, CRs = number of complete responders, OR = estimates odds ratio, CI = confidence interval, P = 2-sided p-value, PS = Zubrod performance status.

B.

|                                                                          | Estimated<br>Odds Ratio | 95% Confidence<br>Interval | Two-sided<br>P-value |
|--------------------------------------------------------------------------|-------------------------|----------------------------|----------------------|
| Model 1. CR rate by age and karyotype category                           |                         |                            |                      |
| Normal diploid                                                           | 1.00                    | Referent                   | Referent             |
| t(9;22)/ <i>BCR/ABL1</i>                                                 | 0.47                    | 0.11 – 1.74                | 0.28                 |
| Other unfavorable <sup>1</sup>                                           | 0.61                    | 0.13 – 2.98                | 0.53                 |
| Miscellaneous                                                            | 0.70                    | 0.18 – 2.37                | 0.58                 |
| Test for heterogeneity among four karyotype categories                   |                         |                            | 0.74                 |
| Age (yrs)                                                                | 0.969                   | 0.938 – 1.001              | 0.061                |
| Model 2. CR rate by age and presence/absence of t(9;22)/ <i>BCR/ABL1</i> |                         |                            |                      |
| t(9;22)/ <i>BCR/ABL1</i> Absent                                          | 1.00                    | Referent                   | Referent             |
| t(9;22)/ <i>BCR/ABL1</i> Present                                         | 0.64                    | 0.25 – 1.70                | 0.36                 |
| Age (yrs)                                                                | 0.969                   | 0.937 – 1.000              | 0.053                |

<sup>1</sup> Other unfavorable is defined by the presence of -7, +8, and 11q23/*MLL* gene rearrangements.
