# Supplementary material
Source: PubMed Central journal article supplement (PMC2254550)
Supplement: blood_blood-2007-10-116186_4.pdf [file blood_blood-2007-10-116186_4.pdf]

A.

|                                                         | Pts | Events | HR    | 95% CI        | P     |
|---------------------------------------------------------|-----|--------|-------|---------------|-------|
| Univariate analyses based on all patients               |     |        |       |               |       |
| Age (yrs)                                               | 83  | 51     | 1.018 | 0.998 – 1.039 | .074  |
| PS 2-3? (0=No, 1=Yes)                                   | 83  | 51     | 1.39  | 0.50 – 3.87   | .55   |
| Male? (0=No, 1=Yes)                                     | 83  | 51     | 1.89  | 1.00 – 3.55   | .039  |
| Nonwhite? (0=No, 1=Yes)                                 | 82  | 50     | 1.79  | 0.89 – 3.60   | .12   |
| WBC (1000/mm <sup>3</sup> )                             | 83  | 51     | 0.996 | 0.987 – 1.006 | .43   |
| Peripheral blasts (%)                                   | 74  | 44     | 1.011 | 1.001 – 1.021 | .031  |
| Peripheral blasts (1000/mm <sup>3</sup> )               | 74  | 44     | 1.011 | 0.999 – 1.023 | .11   |
| Periph. lymphocytes (%)                                 | 81  | 50     | 0.991 | 0.979 – 1.002 | .091  |
| Periph. lymphs (1000/mm <sup>3</sup> )                  | 81  | 50     | 0.985 | 0.963 – 1.007 | .098  |
| Periph. neutrophils (%)                                 | 82  | 51     | 0.995 | 0.978 – 1.011 | .51   |
| Periph. neuts (1000/mm <sup>3</sup> )                   | 82  | 51     | 0.946 | 0.876 – 1.021 | .034  |
| Hemoglobin (g/dL)                                       | 83  | 51     | 0.891 | 0.795 – 0.997 | .041  |
| Platelets (1000/mm <sup>3</sup> )                       | 83  | 51     | 0.996 | 0.992 – 1.001 | .11   |
| Marrow blasts (%)                                       | 69  | 41     | 1.000 | 0.985 – 1.015 | .98   |
| Cytogenetically evaluable?<br>(0=No,1=Yes)              | 83  | 51     | 0.77  | 0.44 – 1.36   | .38   |
| Analyses based on cytogenetically evaluable patients    |     |        |       |               |       |
| t(9;22)/ <i>BCR/ABL1</i> ?<br>(0=No,1=Yes)              | 55  | 32     | 4.80  | 2.05 – 11.2   | .0009 |
| Heterogeneity among 4 karyotype categories (P = 0.0099) |     |        |       |               |       |
| Normal diploid                                          | 15  | 7      | 1.00  | Referent      | Ref.  |
| t(9;22)/ <i>BCR/ABL1</i>                                | 9   | 9      | 5.84  | 2.02 – 16.9   | .0011 |
| Other unfavorable <sup>1</sup>                          | 8   | 4      | 1.27  | 0.37 – 4.35   | .70   |
| Miscellaneous                                           | 23  | 12     | 1.36  | 0.53 – 3.47   | .52   |

<sup>1</sup> Other unfavorable is defined by the presence of -7, +8, and 11q23/*MLL* gene rearrangements.

Abbreviations: Pts = number of patients included in analysis, Events = number of relapses or deaths in remission, HR = estimates hazard ratio, CI = confidence interval, P = 2-sided p-value, PS = Zubrod performance status.

B.

|                                                        | Estimated<br>Hazard Ratio | 95% Confidence<br>Interval | Two-sided<br>P-value |
|--------------------------------------------------------|---------------------------|----------------------------|----------------------|
| Model 1. DFS by karyotype category and age             |                           |                            |                      |
| Normal diploid                                         | 1.00                      | Referent                   | Referent             |
| t(9;22)/ <i>BCR/ABL1</i>                               | 5.70                      | 1.85 – 17.6                | 0.0025               |
| Other unfavorable <sup>1</sup>                         | 1.27                      | 0.37 – 4.34                | 0.71                 |
| Miscellaneous                                          | 1.34                      | 0.52 – 3.49                | 0.54                 |
| Test for heterogeneity among four karyotype categories |                           |                            | 0.0088               |
| Age (yrs)                                              | 1.002                     | 0.977 – 1.027              | 0.89                 |
| Model 2. DFS by karyotype category and sex             |                           |                            |                      |
| Normal diploid                                         | 1.00                      | Referent                   | Referent             |
| t(9;22)/ <i>BCR/ABL1</i>                               | 5.82                      | 2.02 – 16.8                | 0.0011               |
| Other unfavorable <sup>1</sup>                         | 1.24                      | 0.36 – 4.34                | 0.73                 |
| Miscellaneous                                          | 1.37                      | 0.54 – 3.49                | 0.51                 |
| Test for heterogeneity among four karyotype categories |                           |                            | 0.0041               |
| Female                                                 | 1.00                      | Referent                   | Referent             |
| Male                                                   | 1.09                      | 0.49 – 2.40                | 0.84                 |

<sup>1</sup> Other unfavorable is defined by the presence of -7, +8, and 11q23/*MLL* gene rearrangements.

<sup>2</sup> Based on N=XXX patients with known peripheral blast counts.

|                                                                           | Estimated<br>Hazard Ratio | 95% Confidence<br>Interval | Two-sided<br>P-value |
|---------------------------------------------------------------------------|---------------------------|----------------------------|----------------------|
| Model 3. DFS by karyotype category and peripheral blasts (%) <sup>2</sup> |                           |                            |                      |
| Normal diploid                                                            | 1.00                      | Referent                   | Referent             |
| t(9;22)/ <i>BCR/ABL1</i>                                                  | 5.33                      | 1.70 – 16.7                | .0041                |
| Other unfavorable <sup>1</sup>                                            | 1.29                      | 0.37 – 4.48                | .68                  |
| Miscellaneous                                                             | 1.15                      | 0.43 – 3.07                | .78                  |
| Test for heterogeneity among four karyotype categories                    |                           |                            | 0.015                |
| Peripheral blasts (%) <sup>2</sup>                                        | 1.009                     | 0.994 – 1.024              | 0.25                 |

|                                                        |       |               |          |
|--------------------------------------------------------|-------|---------------|----------|
| Model 4. DFS by karyotype category and hemoglobin (%)  |       |               |          |
| Normal diploid                                         | 1.00  | Referent      | Referent |
| t(9;22)/ <i>BCR/ABL1</i>                               | 5.85  | 2.02 – 16.9   | .0011    |
| Other unfavorable <sup>1</sup>                         | 1.25  | 0.37 – 4.29   | .72      |
| Miscellaneous                                          | 1.59  | 0.60 – 4.27   | .36      |
| Test for heterogeneity among four karyotype categories |       |               | .0058    |
| Hemoglobin (g/dL)                                      | 0.897 | 0.742 – 1.084 | .26      |

<sup>1</sup> Other unfavorable is defined by the presence of -7, +8, and 11q23/*MLL* gene rearrangements.

<sup>2</sup> Based on N=49 patients with known peripheral blast counts.
