# Supplementary material
Source: PubMed Central journal article supplement (PMC2254550)
Supplement: blood_blood-2007-10-116186_5.pdf [file blood_blood-2007-10-116186_5.pdf]

| INSTNO | Institution                                        | PI                        |
|--------|----------------------------------------------------|---------------------------|
| 8217   | Akron General Medical Center                       | Esther H. Rehmus, MD      |
| 10225  | Atlanta Regional CCOP                              | Thomas E. Seay, MD, PHD   |
| 10330  | Brooke Army Medical Ctr/Wilford Hall Medical Ctr   | Douglas A. Nelson, MD     |
| 10171  | Camden-Clark Memorial Hospital                     | Nik M. Shah, MD           |
| 10515  | Carilion Medical Center                            | Stephen H. Rosenoff, MD   |
| 10082  | City of Hope National Medical Center               | Kim A. Margolin, MD       |
| 10622  | Columbia Michael Reese Hospital & Medical Center   | Rose Catchatourian, MD    |
| 10251  | Columbia River Oncology Program CCOP               | Keith S. Lanier, MD       |
| 10769  | Columbia University                                | Daniel P. Petrylak, MD    |
| 9005   | Columbus CCOP                                      | Philip Kuebler, MD, PHD   |
| 9006   | Dayton Clinical Oncology Program CCOP              | Howard M. Gross, MD       |
| 10564  | Dwight D. Eisenhower Army Medical Center           | Mary E. Edgecomb, MD      |
| 9007   | Grand Rapids Clinical Oncology Program CCOP        | Marianne K. Lange, MD     |
| 10676  | Harris Methodist - Fort Worth                      | Mark W. Redrow, MD        |
| 501    | Henry Ford Hospital                                | Bob Chapman, MD           |
| 10204  | Huntington Memorial Hospital                       | Benjamin T. Stafford, MD  |
| 10323  | John Muir Medical Center, Walnut Creek Campus      | Robert L. Robles, MD      |
| 9010   | Kansas City CCOP                                   | Rakesh Gaur, MD           |
| 801    | Louisiana State University Medical Center          | Glenn M. Mills, MD        |
| 10816  | Louisiana State University Minority Based CCOP     | Robert W. Veith, MD       |
| 10080  | Loyola University Stritch School of Medicine       | Patrick J. Stiff, MD      |
| 10436  | Memorial Hospital                                  | Daniel T. Tell, DO        |
| 10891  | Montana Cancer Consortium CCOP                     | Benjamin T. Marchello, MD |
| 10449  | North Colorado Medical Center                      | Michael David Stone, MD   |
| 1401   | Ohio State U                                       | Eric H. Kraut, MD         |
| 4100   | Oregon Health & Science University                 | Christopher W. Ryan, MD   |
| 3007   | Puget Sound Oncology Consortium                    | Saul E. Rivkin, MD        |
| 10490  | Riverside Methodist                                | Philip Kuebler, MD, PhD   |
| 10794  | Saint Alphonsus Regional Medical Center            | Carolyn Collins, MD       |
| 10940  | Scott & White Clinic CCOP                          | Lucas Wong, MD            |
| 10284  | Shasta Regional Medical Center                     | Ajay K. Verma, MD         |
| 8215   | Southwest Cancer & Research Center-TTUHSC          | Everardo Cobos, MD        |
| 8300   | St. Bernards Regional Medical Center               | Ronald J. Blachly, MD     |
| 10359  | St. Charles Medical Center                         | Robert F. Boone, MD       |
| 10357  | St. Louis University                               | Paul J. Petruska, MD      |
| 10892  | St. Luke's - Roosevelt Hospital Center             | Michael L. Grossbard, MD  |
| 10455  | Temple University                                  | Kenneth F. Mangan, MD     |
| 1801   | Tulane University Medical Center                   | Edgardo S. Santos, MD     |
| 101    | University of Arkansas for Medical Sciences        | Laura F. Hutchins, MD     |
| 10176  | University of California at Davis                  | David R. Gandara, MD      |
| 10509  | University of Cincinnati Medical Center            | Rami S. Komrokji, MD      |
| 10120  | University of Colorado Cancer Center               | Anthony D. Elias, MD      |
| 10781  | University of Hawaii MBCCOP                        | Jeffrey L. Berenberg, MD  |
| 3012   | University of Mississippi Medical Center           | Darryl Hamilton, MD       |
| 3000   | University of New Mexico                           | Laurence Elias, MD        |
| 10586  | University of South Alabama Cancer Center - MBCCOP | Marcel E. Conrad, MD      |
| 2400   | University of Texas Health Science Center          | Julie A. Kish, MD         |
| 2501   | University of Utah Medical Center                  | John H. Ward, MD          |
| 10122  | Upstate Carolina CCOP                              | Jay Bearden III, MD       |
| 9011   | Virginia Mason CCOP                                | Andrew D. Jacobs, MD      |
| 2701   | Wayne State University Medical Center              | Larry Flaherty, MD        |
| 9017   | Wichita CCOP                                       | Shaker R. Dakhlil, MD     |
